# Supplementary material for: NiFe2O4, Fe3O4–FexNiy or FexNiy loaded porous activated carbon balls as lightweight microwave absorbents
Source: Royal Society of Chemistry journal article supplement (doi:10.1039/c4ra13443e), 2014-12-23
Supplement: c4ra13443e1.pdf [file c4ra13443e1.pdf]

**Electronic Supplementary Information**

**NiFe<sub>2</sub>O<sub>4</sub>, Fe<sub>3</sub>O<sub>4</sub>-Fe<sub>x</sub>Ni<sub>y</sub> or Fe<sub>x</sub>Ni<sub>y</sub> loaded Porous Activated  
Carbon Balls as Lightweight Microwave Absorbent**

Guomin Li <sup>a,b</sup>, Liancheng Wang <sup>a</sup>, Wanxi Li <sup>a,b</sup>, and Yao Xu <sup>a,\*</sup>

<sup>a</sup> Key Laboratory of Carbon Materials, Institute of Coal Chemistry, Chinese Academy  
of Sciences, Taiyuan 030001, China

<sup>b</sup> University of Chinese Academy of Sciences, Beijing 100049, China

---

\* Address for correspondence. E-mail: [xuyao@sxicc.ac.cn](mailto:xuyao@sxicc.ac.cn)

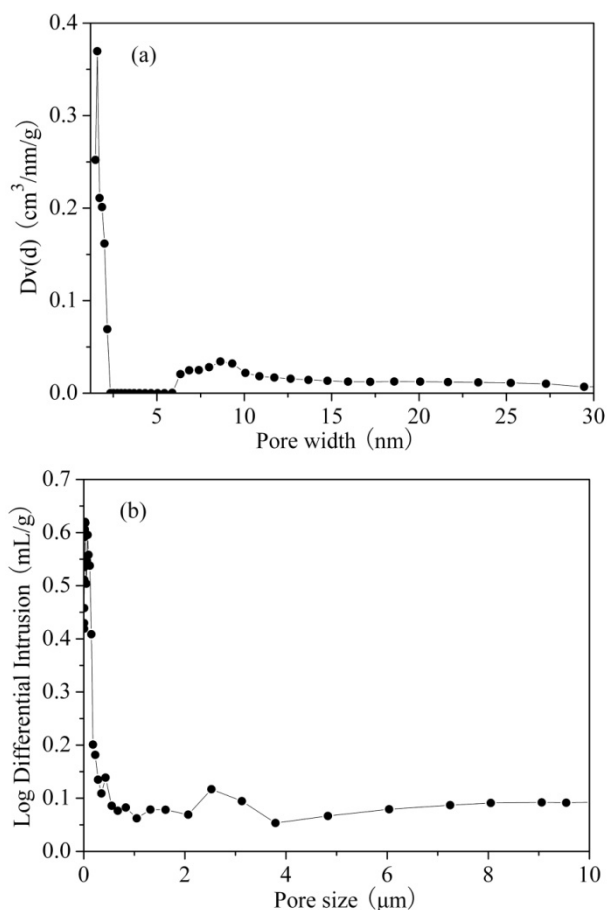

**Fig. S1** Pore size distribution of the pristine PACB (a) from the adsorption branches of the isotherms using BJH method, (b) from mercury porosimetry.

Fig. S1a shows the pore size distribution curve of the pristine PACB, calculated from the adsorption branches of the isotherms using BJH method according to density functional theory. The pore size focuses on the range of 1–2.5 nm and 6–12 nm, exhibiting the characteristic of microporosity and mesoporosity. Fig. S1b gives the pore size distribution measured through mercury porosimeter, indicating that the pore is micron size, and its size  $d \leq 4 \mu\text{m}$ .

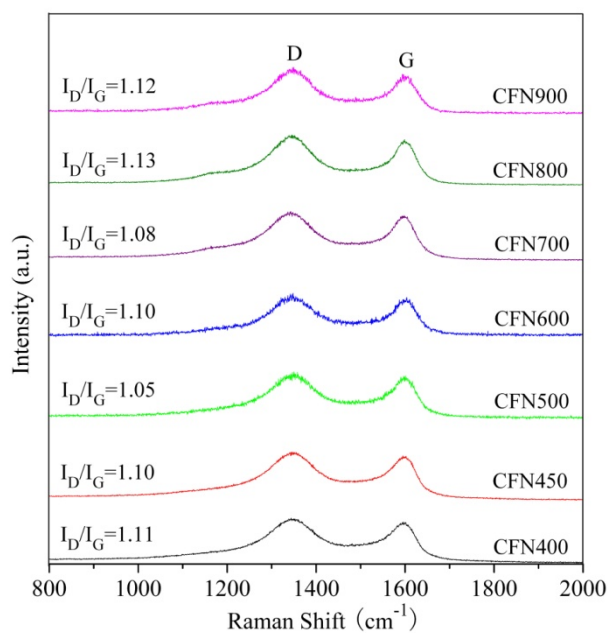

**Fig. S2** Normal Raman spectra of PACB composites treated at different temperature.

Fig. S2 gives the typical Raman spectra of CFN400, CFN450, CFN500, CFN600, CFN700, CFN800, and CFN900. The spectra were collected in the range of 800–2000  $\text{cm}^{-1}$ , in which two characteristic bands appeared. That is the D peak at around 1350  $\text{cm}^{-1}$  and G peak at about 1590  $\text{cm}^{-1}$ , which represent the disordered carbon structure and graphite carbon, respectively, and the degree of graphitization can be represented by the relative intensity ratio ( $R=I_D/I_G$ ). It is evident that no obvious change of graphitization was observed after heat treatment compared with 1.11 of the pristine PACB.

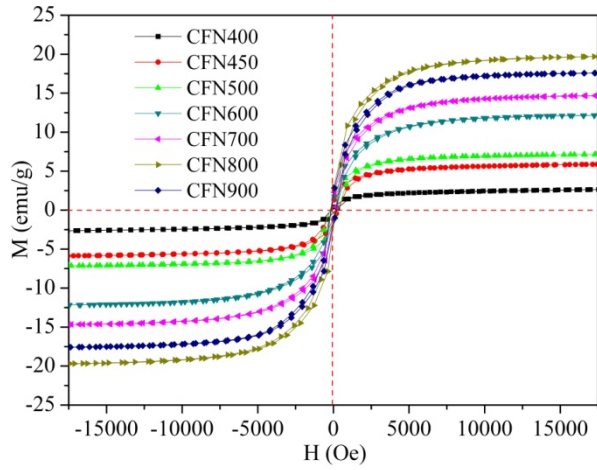

**Fig. S3** Magnetic hysteresis loop of the samples measured at room temperature.

Fig. S3 gives the magnetic hysteresis loops of the samples, the magnetization curves show a similar magnetic behavior.

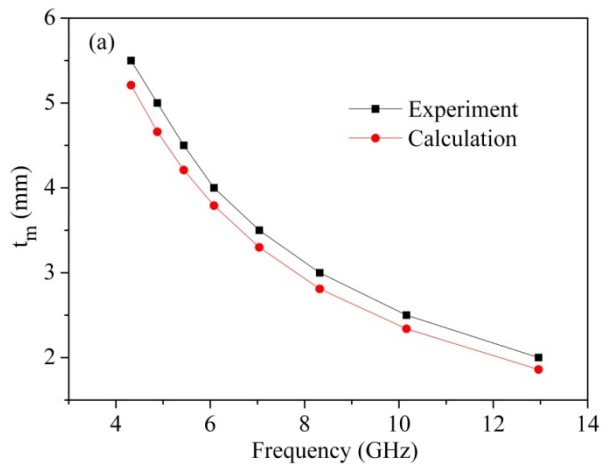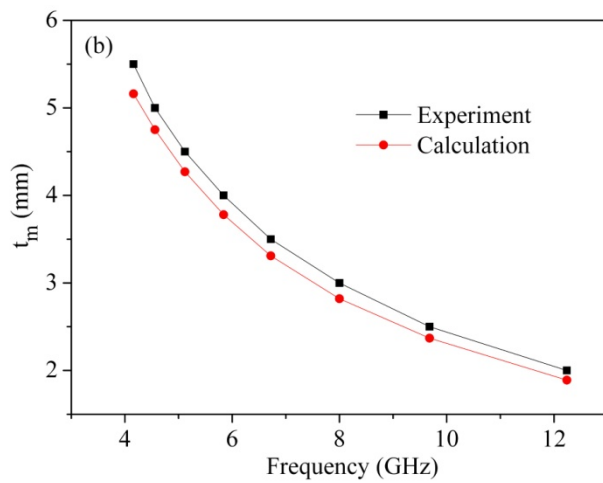

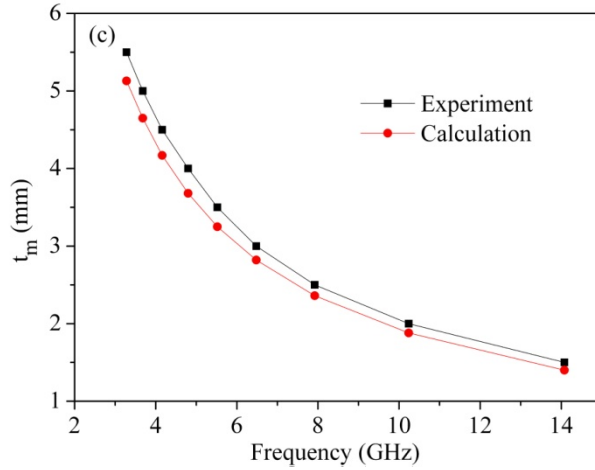

**Fig. S4** dependence of  $\lambda/4$  thickness (calculated and experimental) on frequency for the PACB composites: (a) CFN400, (b) CFN500, and (c) CFN800.

Fig. S4 displays the dependence of  $\lambda/4$  thickness on frequency for the PACB composites. After comparing the matching thickness  $t_m^{cal}$  calculated by Eq. (9) ( $f=f_m$ ) with the experimental matching thickness  $t_m^{exp}$ , it's evident that the calculated result  $t_m^{cal}$  agrees well with the experimental value  $t_m^{exp}$ .

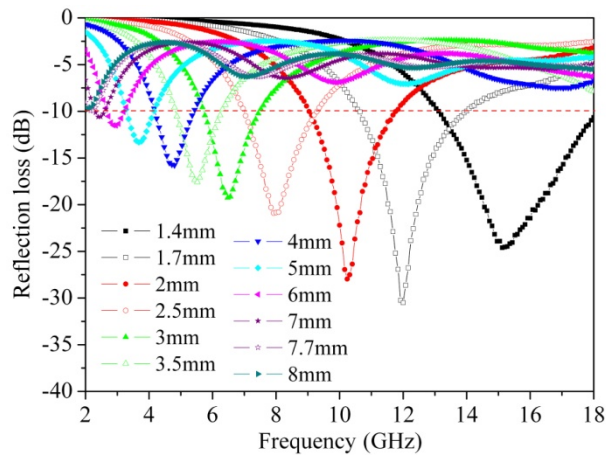

**Fig. S5** Microwave RL curves of the CFN800 at different coating thickness.
